# Supplementary material for: The construction of Cu(i)/Cu(ii) coordination polymers based on pyrazine–carboxylate: Structural diversity tuned by in situ hydrolysis reaction
Source: Royal Society of Chemistry journal article supplement (doi:10.1039/c3ce26817a), 2013-01-01
Supplement: c3ce26817a.pdf [file c3ce26817a.pdf]

# The construction of Cu(I)/Cu(II) coordination polymers based on pyrazine-carboxylate: structural diversity tuned by *in situ* hydrolysis reaction

ZhenZhen Wen, SongLiang Cai, ShengRun Zheng\*, Jun Fan, Wei-Guang Zhang\*

School of Chemistry and Environment, South China Normal University, Guangzhou, 510006, P. R. China. E-mail: [zhengsr@scnu.edu.cn](mailto:zhengsr@scnu.edu.cn).

[wgzhang@scnu.edu.cn](mailto:wgzhang@scnu.edu.cn); Fax: +86-20-39347768

## Supporting information

Table S1 Selected bond lengths [Å] and angles [°] for the compounds.<sup>a</sup>

| Compound 1         |            |                     |           |
|--------------------|------------|---------------------|-----------|
| Cu(1)-N(1)         | 1.978(8)   | Cu(2)-O(4)#2        | 1.918(6)  |
| Cu(1)-O(1)         | 1.989(6)   | Cu(2)-N(3)#2        | 2.017(8)  |
| Cu(1)-N(4)#1       | 2.057(9)   | Cu(2)-N(2)          | 2.020(9)  |
| Cu(1)-Cl(1)        | 2.222(3)   | Cu(2)-Cl(2)         | 2.235(3)  |
| Cu(1)-O(3)         | 2.385(6)   | Cu(2)-O(2)#3        | 2.436(6)  |
| N(1)-Cu(1)-O(1)    | 82.4(3)    | O(4)#2-Cu(2)-N(3)#2 | 83.2(3)   |
| N(1)-Cu(1)-N(4)#1  | 169.2(3)   | O(4)#2-Cu(2)-N(2)   | 89.8(3)   |
| O(1)-Cu(1)-N(4)#1  | 86.9(3)    | N(3)#2-Cu(2)-N(2)   | 168.8(3)  |
| N(1)-Cu(1)-Cl(1)   | 95.4(2)    | O(4)#2-Cu(2)-Cl(2)  | 174.7(2)  |
| O(1)-Cu(1)-Cl(1)   | 172.3(2)   | N(3)#2-Cu(2)-Cl(2)  | 94.2(2)   |
| N(4)#1-Cu(1)-Cl(1) | 95.4(2)    | N(2)-Cu(2)-Cl(2)    | 92.1(2)   |
| N(1)-Cu(1)-O(3)    | 82.0(3)    | O(4)#2-Cu(2)-O(2)#3 | 90.6(2)   |
| O(1)-Cu(1)-O(3)    | 86.4(2)    | N(3)#2-Cu(2)-O(2)#3 | 106.6(3)  |
| N(4)#1-Cu(1)-O(3)  | 95.9(3)    | N(2)-Cu(2)-O(2)#3   | 82.1(3)   |
| Cl(1)-Cu(1)-O(3)   | 100.63(17) | Cl(2)-Cu(2)-O(2)#3  | 94.56(17) |
| Compound 2a        |            |                     |           |
| Cu(1)-O(4)         | 1.932(7)   | Cu(2)-N(3)#1        | 2.002(8)  |
| Cu(1)-O(1)         | 1.935(7)   | Cu(2)-N(2)          | 2.017(8)  |
| Cu(1)-N(1)         | 1.997(8)   | Cu(2)-Cl(1)         | 2.378(3)  |
| Cu(1)-N(4)         | 2.000(8)   | Cu(2)-Cl(1)#2       | 2.613(4)  |

|                  |          |                      |           |
|------------------|----------|----------------------|-----------|
| Cu(1)-O(1W)      | 2.289(8) |                      |           |
| O(4)-Cu(1)-O(1)  | 173.0(3) | N(1)-Cu(1)-O(1W)     | 92.8(3)   |
| O(4)-Cu(1)-N(1)  | 96.5(3)  | N(4)-Cu(1)-O(1W)     | 89.0(3)   |
| O(1)-Cu(1)-N(1)  | 82.6(3)  | N(3)#1-Cu(2)-N(2)    | 142.0(3)  |
| O(4)-Cu(1)-N(4)  | 82.6(3)  | N(3)#1-Cu(2)-Cl(1)   | 96.9(2)   |
| O(1)-Cu(1)-N(4)  | 98.1(3)  | N(2)-Cu(2)-Cl(1)     | 102.5(2)  |
| N(1)-Cu(1)-N(4)  | 178.0(3) | N(3)#1-Cu(2)-Cl(1)#2 | 97.4(3)   |
| O(4)-Cu(1)-O(1W) | 92.0(3)  | N(2)-Cu(2)-Cl(1)#2   | 100.0(2)  |
| O(1)-Cu(1)-O(1W) | 95.0(3)  | Cl(1)-Cu(2)-Cl(1)#2  | 121.08(9) |

### Compound 3

|                     |           |                   |           |
|---------------------|-----------|-------------------|-----------|
| I(1)-Cu(2)#1        | 2.631(2)  | Cu(2)-N(4)#3      | 2.096(13) |
| I(1)-Cu(2)          | 2.649(2)  | Cu(3)-O(3)        | 1.929(12) |
| I(1)-Cu(1)          | 2.650(2)  | Cu(3)-O(1)        | 1.961(11) |
| I(2)-Cu(1)#2        | 2.655(2)  | Cu(3)-N(3)        | 1.999(13) |
| I(2)-Cu(1)          | 2.656(2)  | Cu(3)-N(1)        | 2.010(13) |
| I(2)-Cu(2)#2        | 2.707(3)  | Cu(3)-O(5)        | 2.227(14) |
| Cu(1)-N(2)          | 2.091(13) |                   |           |
| N(2)-Cu(1)-I(1)     | 105.3(4)  | I(1)-Cu(2)-I(2)#2 | 114.68(9) |
| N(2)-Cu(1)-I(2)#2   | 108.5(4)  | O(3)-Cu(3)-O(1)   | 171.5(6)  |
| I(1)-Cu(1)-I(2)#2   | 116.45(8) | O(3)-Cu(3)-N(3)   | 83.2(5)   |
| N(2)-Cu(1)-I(2)     | 102.9(4)  | O(1)-Cu(3)-N(3)   | 96.4(5)   |
| I(1)-Cu(1)-I(2)     | 106.88(8) | O(3)-Cu(3)-N(1)   | 94.9(5)   |
| I(2)#2-Cu(1)-I(2)   | 115.56(9) | O(1)-Cu(3)-N(1)   | 83.4(5)   |
| N(4)#3-Cu(2)-I(1)#1 | 107.7(3)  | N(3)-Cu(3)-N(1)   | 165.5(6)  |
| N(4)#3-Cu(2)-I(1)   | 108.9(3)  | O(3)-Cu(3)-O(5)   | 97.4(5)   |
| I(1)#1-Cu(2)-I(1)   | 119.50(8) | O(1)-Cu(3)-O(5)   | 91.1(5)   |
| N(4)#3-Cu(2)-I(2)#2 | 99.8(4)   | N(3)-Cu(3)-O(5)   | 99.4(6)   |
| I(1)#1-Cu(2)-I(2)#2 | 104.29(8) | N(1)-Cu(3)-O(5)   | 95.1(6)   |

<sup>a</sup>Symmetry transformations used to generate equivalent atoms: #1  $x+1,y,z$  #2  $x,y,z+1$  #3  $x,-y+1,z+1/2$  for compound **1**;  
 #1  $x+1,-y+3/2,z+1/2$  #2  $-x+1,y-1/2,-z+3/2$  for compound **2a**; #1  $-x,-y+1,-z+1$  #2  $-x,y,-z+1/2$  for compound **3**.

Scheme S1. Synthetic route of the ligand *L*

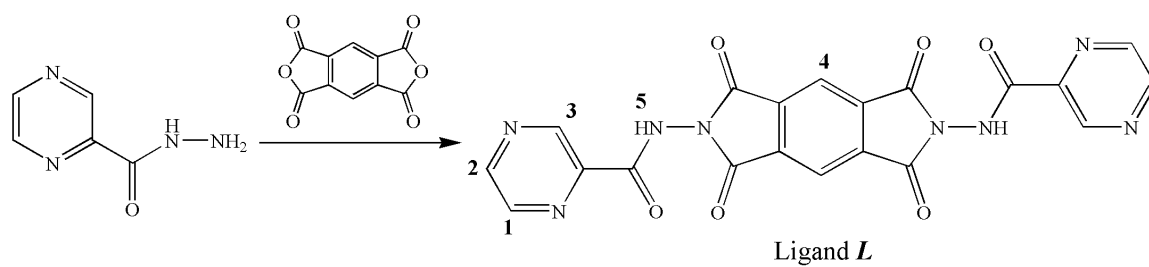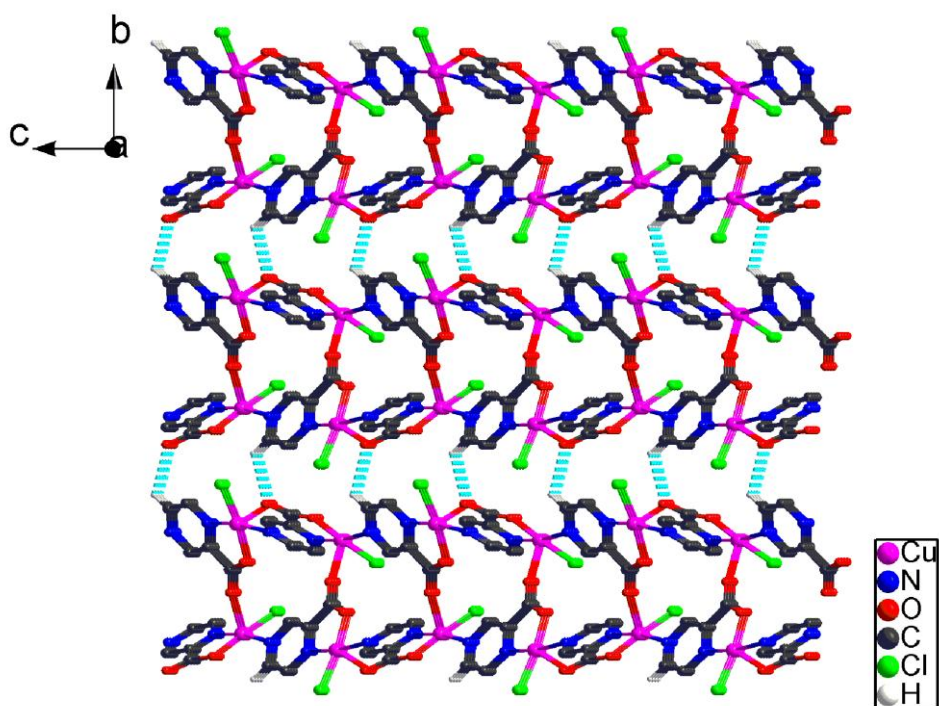

Figure S1. The 3D supramolecular framework of compound **1** assembled through interlayer hydrogen bonding interactions between the 2D double-layer (hydrogen bonds shown as dashed lines)
